# Supplementary material for: BMP2-induced chemotaxis requires PI3K p55γ/p110α-dependent phosphatidylinositol (3,4,5)-triphosphate production and LL5β recruitment at the cytocortex
Source: PubMed Central journal article supplement (PMC4071339; doi:10.1186/1741-7007-12-43), 2014-05-30
Supplement: 1741-7007-12-43-S5.pdf [file 1741-7007-12-43-S5.pdf]

## Additional file 5: Figure S5 related to Figure 5

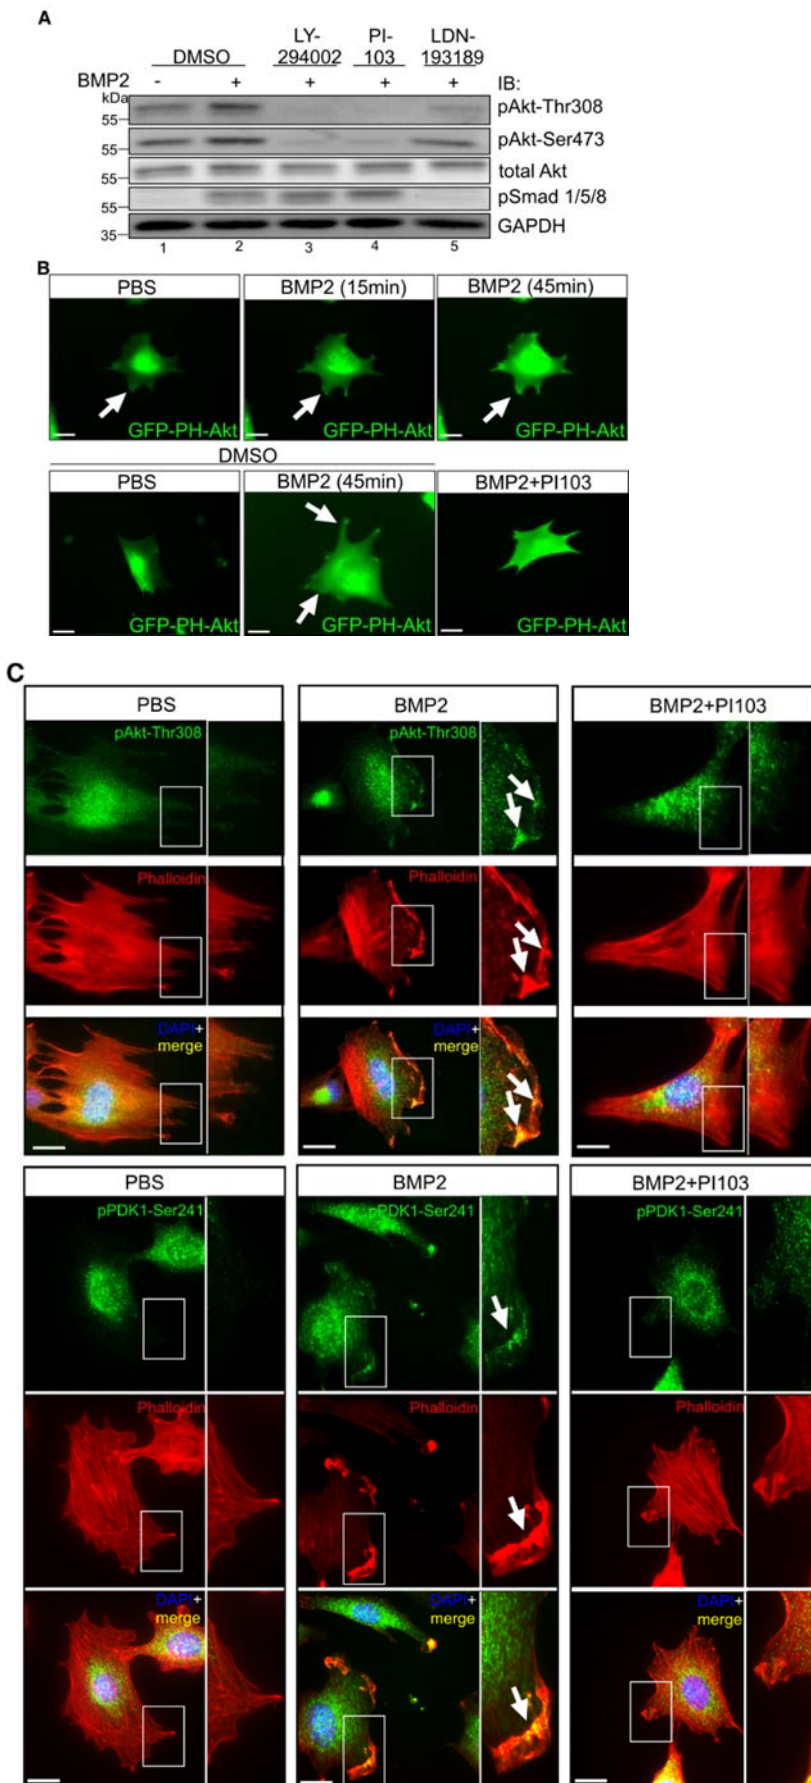

**D**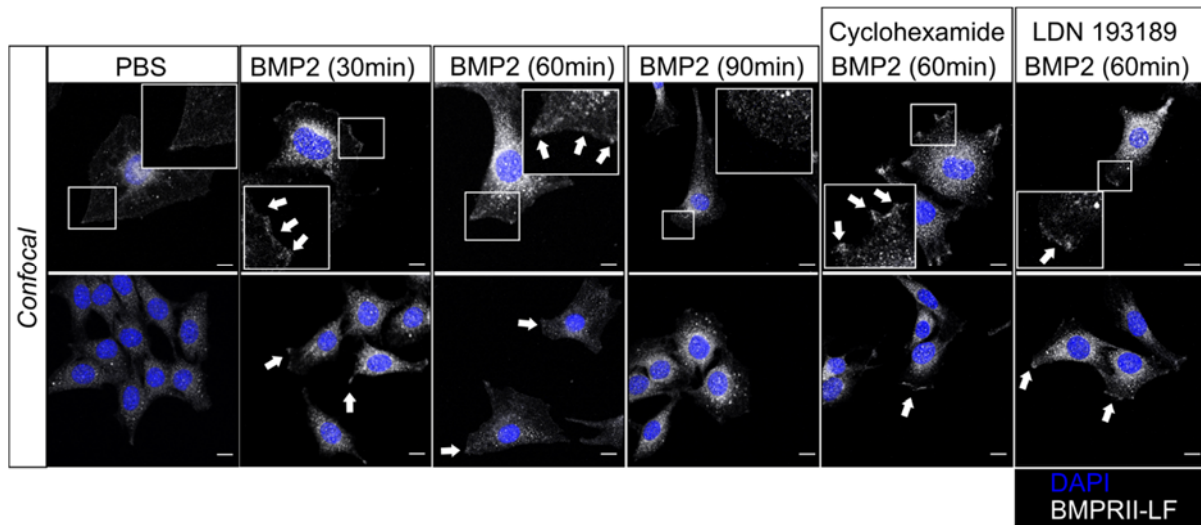

**Figure S5. Effect of small molecule inhibitors on signalling, PH-Akt-GFP translocation, phospho-Akt/phospho-PDK1 and BMPRII localisation. (A)** Effect of PI3K specific and BMP type I receptor specific inhibitors on BMP2 signalling. Western Blot analysis showing BMP2-dependent phosphorylation of Akt-Thr303, Akt-Ser472 and Smad1/5/8. Cells were pre-treated for 1 hour with inhibitors LY-294002 [10 $\mu$ M], PI103 [8nM] and LDN-193189 [0.5 $\mu$ M] and stimulated with BMP2 [10nM] for 60 minutes. The effect of small molecule inhibition on BMP2 induced signalling was compared to a DMSO treated control. **(B)** BMP2-dependent GFP-PH-Akt translocation. Immunofluorescence of C2C12 cells transfected with GFP-PH-Akt. Upper panel shows stills of a 45 minutes time laps series of BMP2 [10nM] stimulated C2C12 cells transfected with GFP-tagged PH domain of Akt. White arrowheads point towards increased GFP signal accumulation. The lower panel shows GFP-PH-Akt translocation upon 45 minutes BMP2 stimulation [10nM] compared to GFP-PH-Akt translocation when cells were pre-treated with PI103 [8nM]. White arrowheads point towards areas of intense GFP signal. Scale bars represent 20  $\mu$ m. **(C)** BMP2 induces phospho Akt and phospho PDK1 at the leading edge. Immunofluorescence showing localization of phospho-Akt Thr308 and phospho PDK1-Ser241 together with F-actin in C2C12 cells upon BMP2 [10nM] stimulation for 60 minutes. Protrusive regions with cortical actin are magnified. BMP2-induced localization of cortical actin and phospho-Akt Thr308 as well as phospho-PDK1 were compared to cells pre-treated with the class Ia PI3K selective inhibitor PI103 [8nM]. Arrowheads point towards co-localization of phospho-Akt Thr308 and cortical actin. Scale bars represent 20 $\mu$ m. **(D)** Confocal analysis of the localisation of endogenous BMPRII-LF in C2C12 cells upon 10nM BMP2 treatment for indicated time using an antibody which detects the c-terminal tail of BMPRII-LF. (Cell Signaling Tec. #6979). Cyclohexamide [10mg/ml] treatment was performed 6 hours and

0.5 $\mu$ M LDN193189 1 hour prior to stimulation. Arrows indicate for ruffle associated endogenous BMPRII. Scale bars indicate 10 $\mu$ M.
